# Supplementary material for: Degradation of norfloxacin by the synergistic effect of micro–nano bubbles and sodium hypochlorite: kinetics, influencing factors and pathways
Source: Royal Society of Chemistry journal article supplement (doi:10.1039/d4em00490f), 2024-01-01
Supplement: d4em00490f1.pdf [file d4em00490f1.pdf]

## Supplementary information

**Table 1 Comparison of redox potentials**

| system                    | ORP (mV) |
|---------------------------|----------|
| 0.01%NaClO/purified water | 443.3    |
| 0.01%NaClO/MNBs           | 510.9    |
| 0.1%NaClO/purified water  | 734.7    |
| 0.1%NaClO/MNBs            | 890.3    |

**Table 2 Intermediate products of NOR**

| substance        | m/z | structural formula                                                                  | molecular formula     | reference          |
|------------------|-----|-------------------------------------------------------------------------------------|-----------------------|--------------------|
| parent substance | 319 | 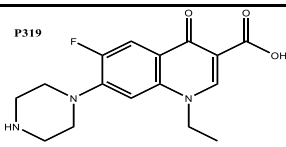   | $C_{16}H_{18}FN_3O_3$ | -                  |
| product          | 142 |   | $C_7H_7FO_2$          | <a href="#">44</a> |
| product          | 284 |  | $C_{14}H_{22}FN_3O_2$ | <a href="#">44</a> |
| product          | 163 |  | $C_9H_9NO_2$          | <a href="#">44</a> |
| product          | 336 |  | $C_{16}H_{19}N_3O_5$  | <a href="#">44</a> |
| product          | 279 |  | $C_{14}H_{15}FN_2O_3$ | <a href="#">45</a> |
| product          | 114 |  | $C_6H_6FN$            | <a href="#">46</a> |

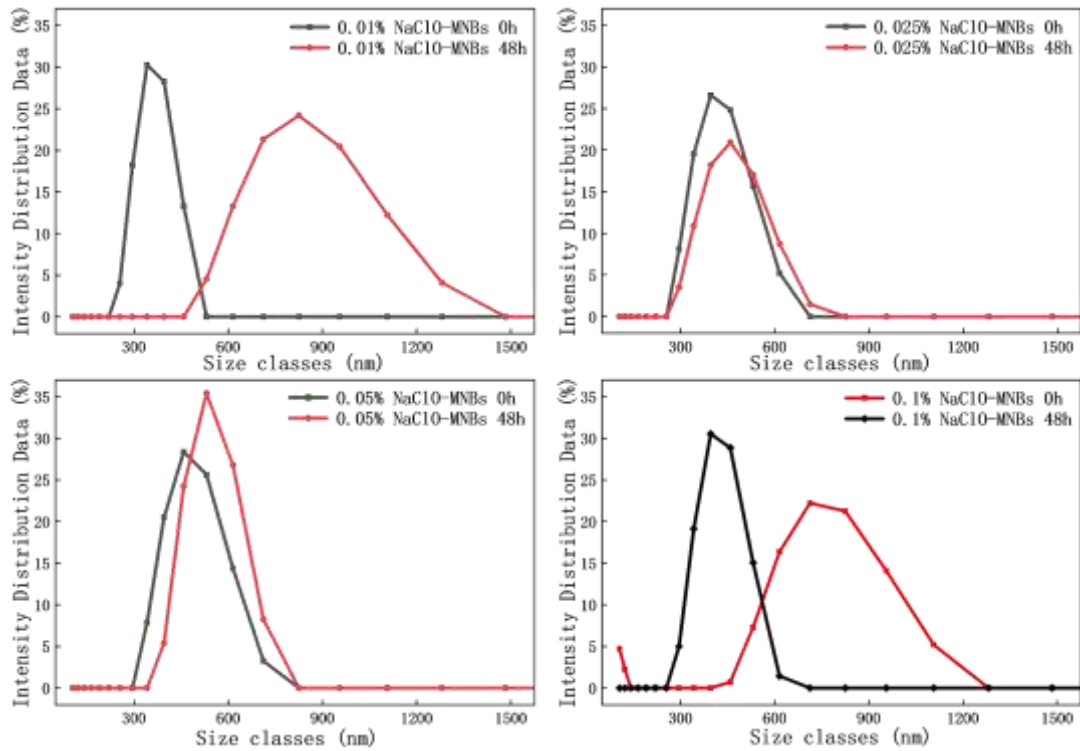

**Fig.1** Bubble size distribution of MNBs/NaClO solution

(Initial conditions: MNBs solution was aerated for 10 min and cooled to room temperature, solution pH 6.5)

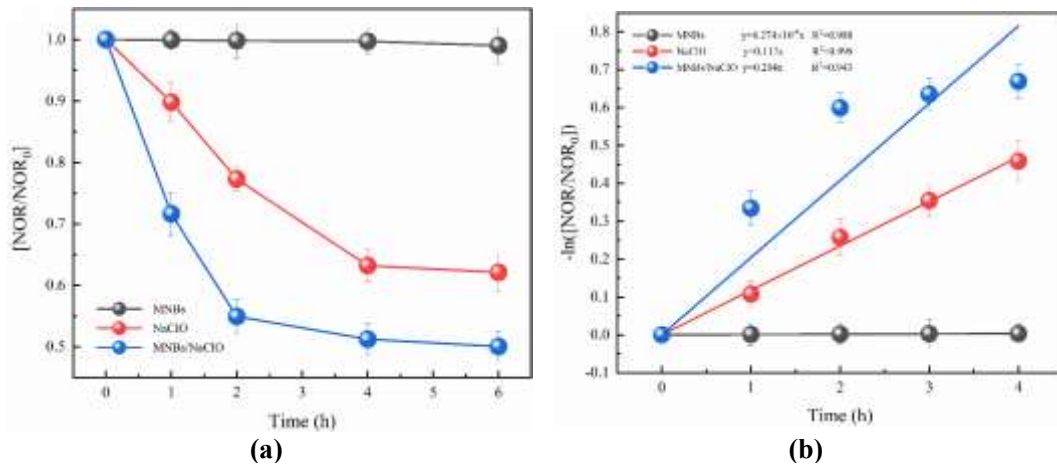

**Fig.2 (a)** NOR degradation in different systems **(b)** Pseudo-first-order kinetics lines corresponding to the data set

(Initial conditions:  $3.132 \times 10^{-5}$  mM NOR, volume concentration 0.025%NaClO, MNBs solution aeration for 10 min, solution pH 6.5)

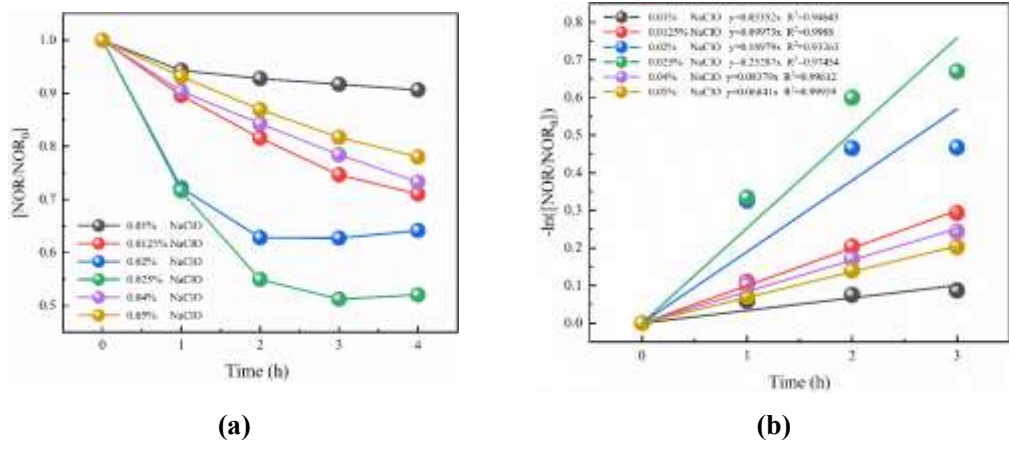

**Fig.3 (a) Effect of NaClO concentration on NOR degradation in MNBs/NaClO system (b) Pseudo-first-order kinetics lines corresponding to the data set (Initial conditions:  $3.132 \times 10^{-5}$  mM NOR, MNBs solution aeration for 10 min, solution pH 6.5)**

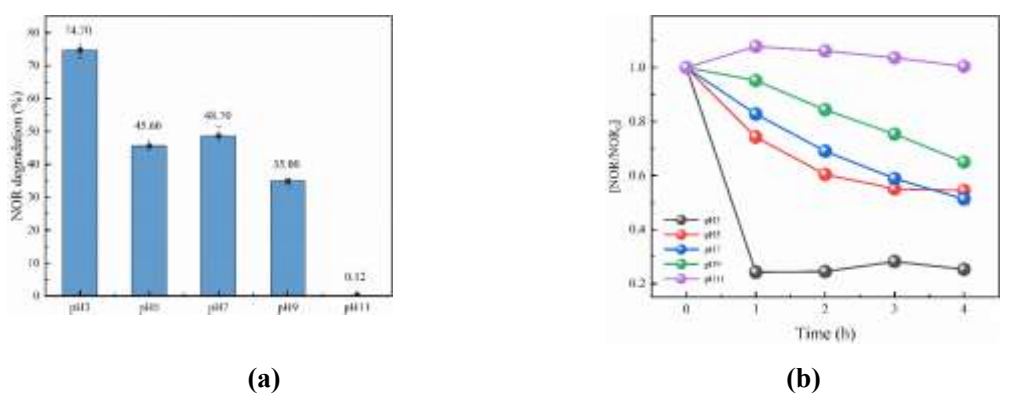

**Fig.4 (a) Degradation rate of NOR (b) Effect of pH on NOR degradation in MNBs/NaClO system (Initial conditions:  $3.132 \times 10^{-5}$  mM NOR, volume concentration 0.025%NaClO, MNBs solution aeration for 10 min)**

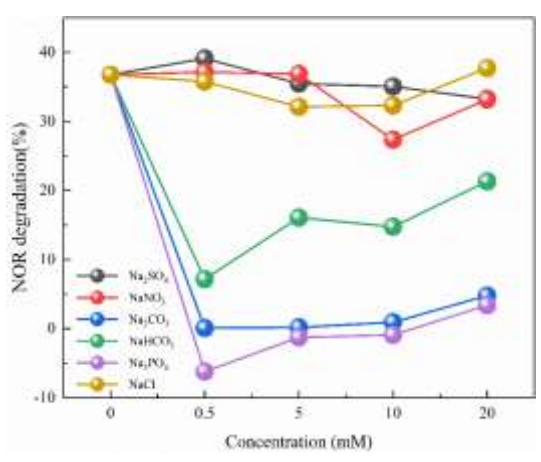

**Fig.5 Effect of inorganic anions on NOR degradation in MNBs/NaClO system (Initial conditions:  $3.132 \times 10^{-5}$  mM NOR, volume concentration 0.025%NaClO, MNBs solution aeration for 10 min, solution pH 6.5)**

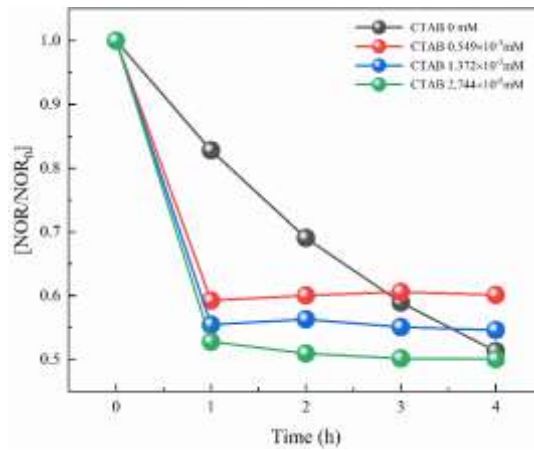

**Fig.6 Effect of cationic surfactants on NOR degradation in MNBs/NaClO system**  
**(Initial conditions:  $3.132 \times 10^{-5}$  mM NOR, volume concentration 0.025% NaClO, MNBs solution aeration for 10 min, solution pH 6.5)**

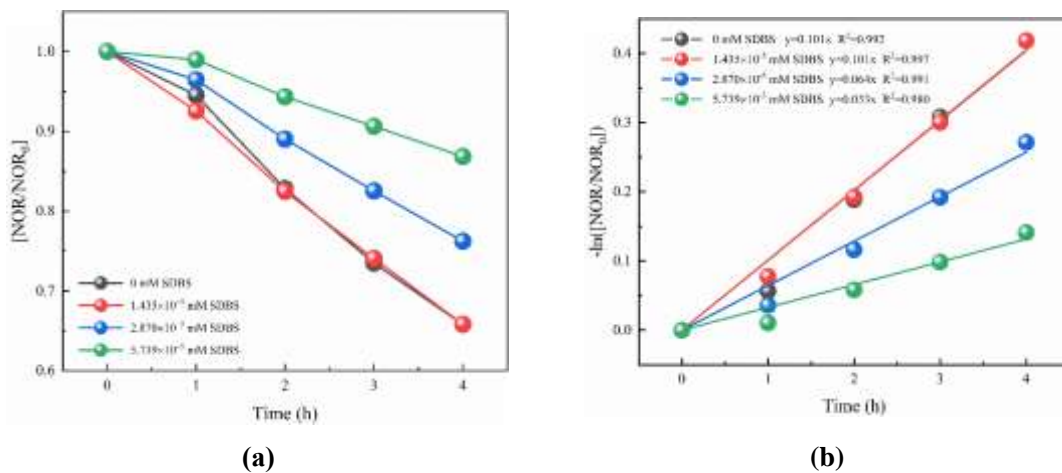

**Fig.7 (a) Effect of anionic surfactant on NOR degradation in MNBs/NaClO system**  
**(b) Pseudo-first-order kinetics lines corresponding to the data set**  
**(Initial conditions:  $3.132 \times 10^{-5}$  mM NOR, volume concentration 0.025% NaClO, MNBs solution aeration for 10 min, solution pH 6.5)**

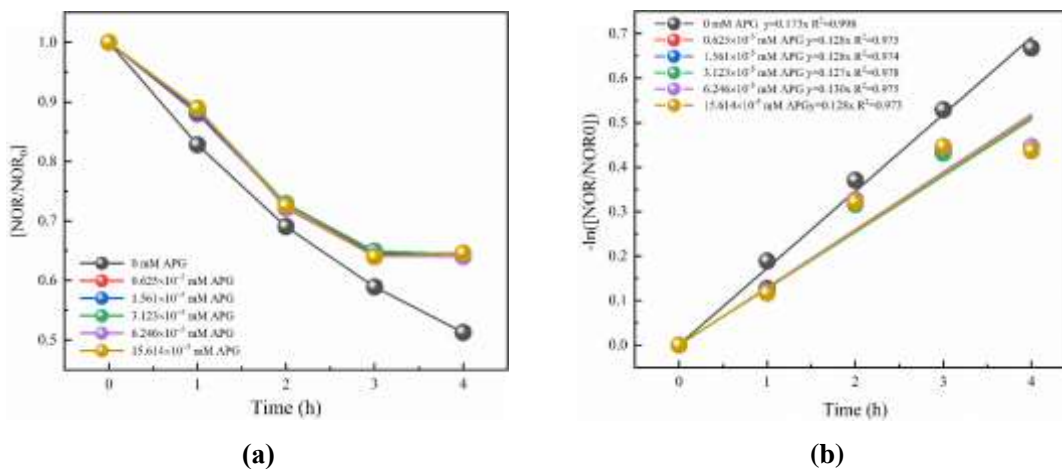

**Fig.8 (a) Effect of nonionic surfactant on NOR degradation in MNBs/NaClO system (b)**

Pseudo-first-order kinetics lines corresponding to the data set

(Initial conditions:  $3.132 \times 10^{-5}$  mM NOR, volume concentration 0.025 % NaClO, MNBs solution aeration for 10 min, solution pH 6.5)

---

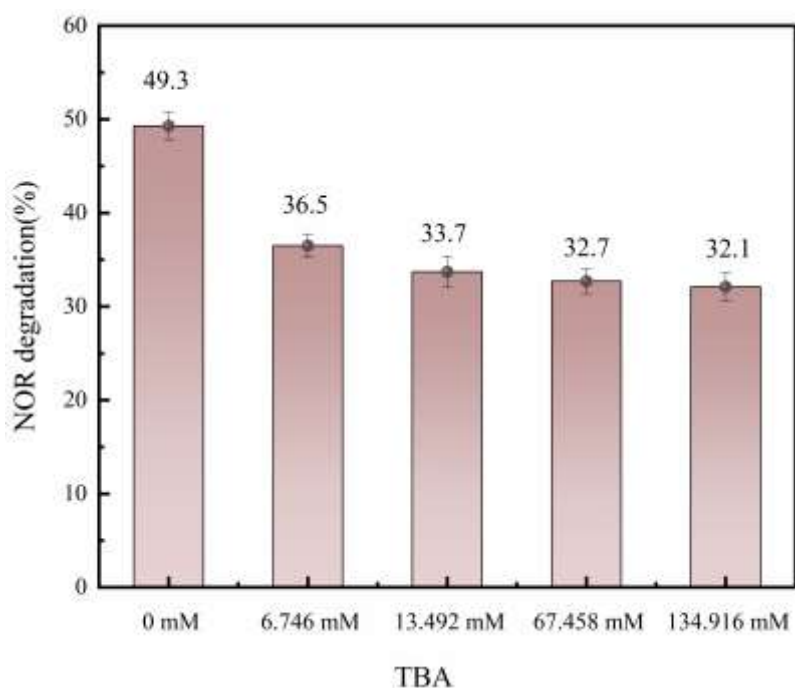

Fig.9 Quenching experiment of tert-butanol on hydroxyl radical

(Initial conditions:  $3.132 \times 10^{-5}$  mM NOR, volume concentration 0.025 % NaClO, MNBs solution aeration for 10 min, solution pH 6.5)

---

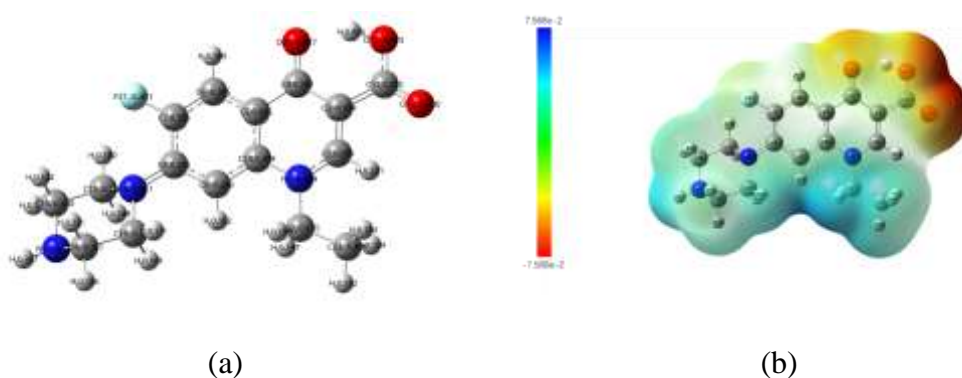

Fig.10 (a) Charge distribution of NOR (b) Molecule surface electrostatic potential of NOR

---

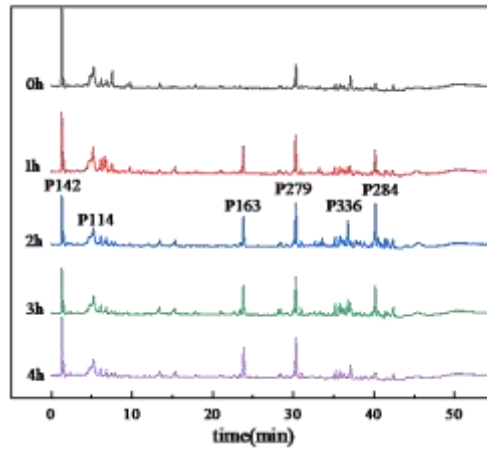

(a)

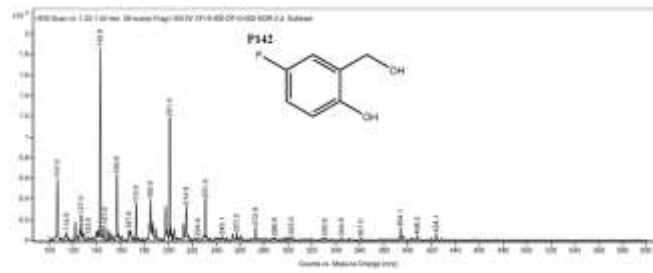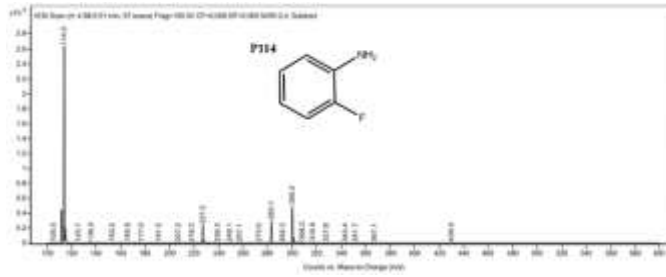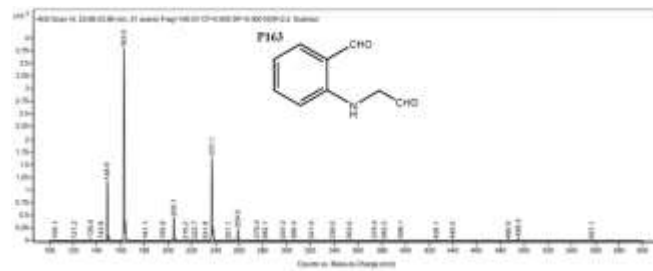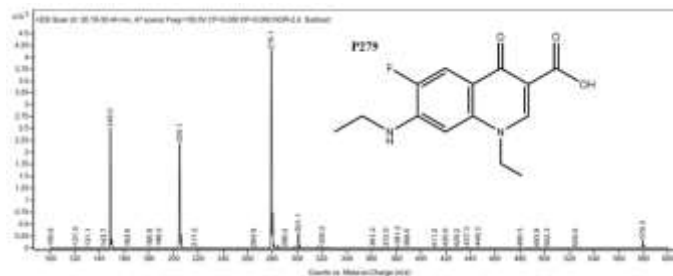

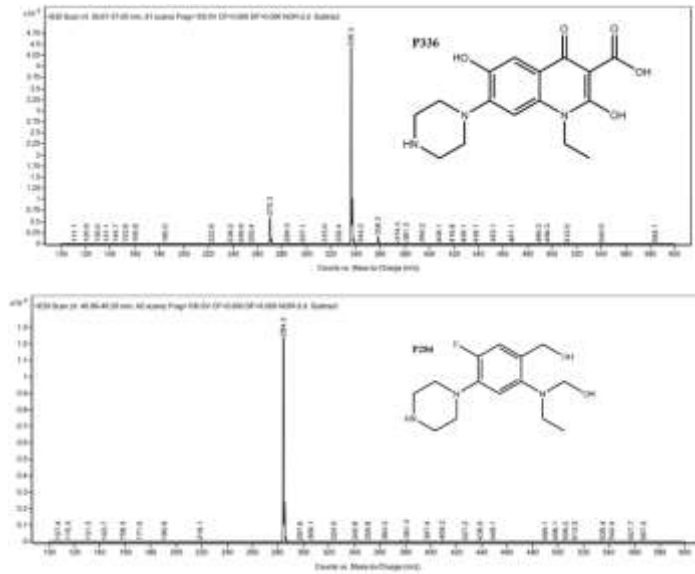

(b)

Fig.11 (a) Liquid chromatogram of NOR (b) Mass spectrometry of NOR

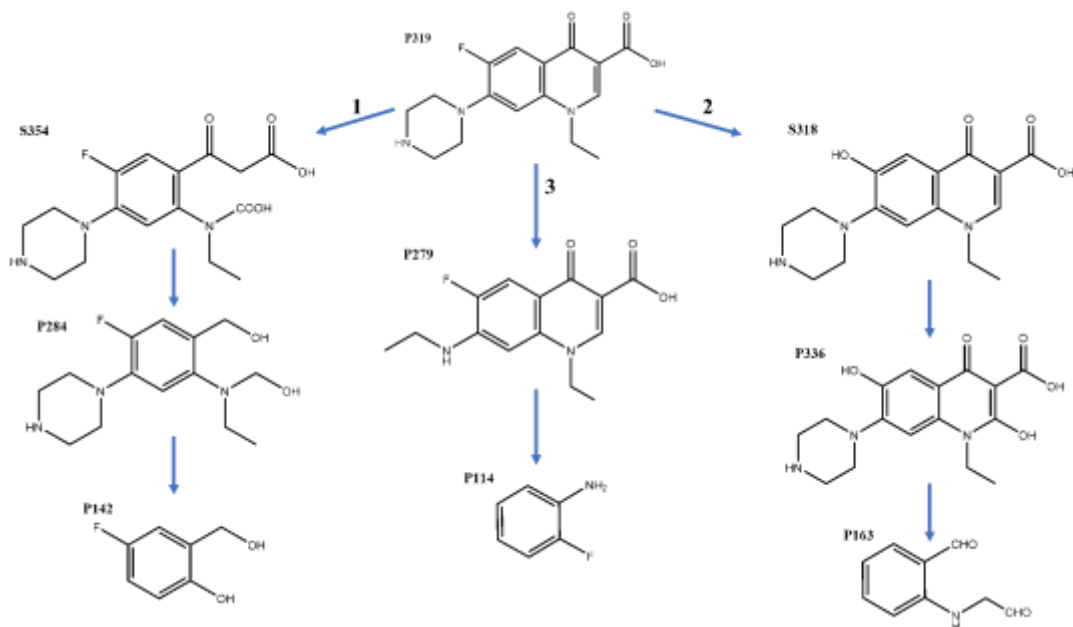

Fig.12 Possible degradation pathways of NOR
